# Supplementary material for: LACTB-Induced ERBB3 Degradation Inhibits Lipid Synthesis and Suppresses Glioma Growth
Source: Research Square preprint supplement (doi:10.21203/rs.3.rs-6668629/v1), 2025-06-12
Supplement: Supplementary file 1 [file c83222fc4ab084a546276425.docx]

**Supplementary Information**

**LACTB-Induced ERBB3 Degradation Inhibits Lipid Synthesis and Suppresses Glioma Growth**

Yanjia Hu, Zhaoying Zhu, Feng Ye, Meng Tian, Jin Li, Shuang Luo, Jing Chen, Jianguo Xu, Yaohui Chen, Hao Liu

**Correspondence:** Xu J ([xujg@scu.edu.cn](mailto:xujg@scu.edu.cn)), Chen Y ([yhchen@scu.edu.cn](mailto:yhchen@scu.edu.cn)) and Liu H ([liuhao@wchscu.cn](mailto:liuhao@wchscu.cn)).

This Word file includes:

Supplementary Figures S1-S7

Supplementary Tables S1-S2


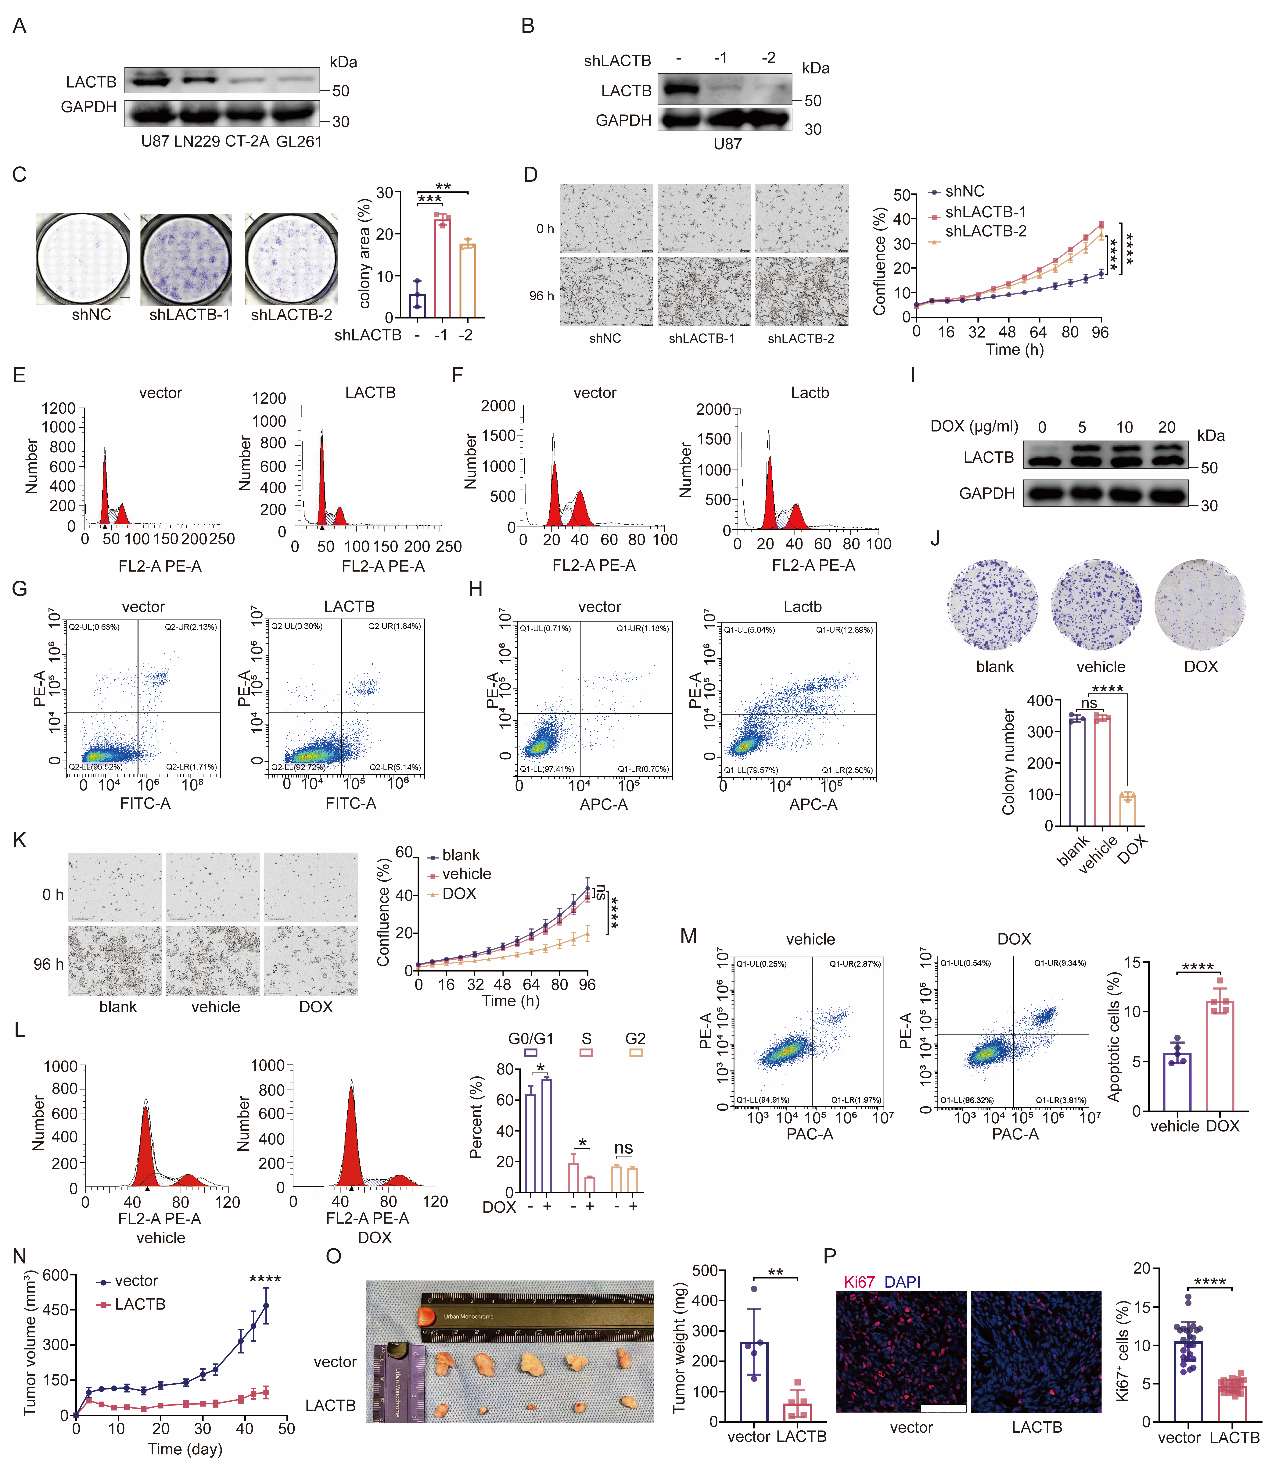


**Supplementary Fig. S1. LACTB suppresses growth and promotes apoptosis of glioma cells.** (A)Western blotting of LACTB and GAPDH in U87, LN229, CT-2A and GL261 cells. (B)Western blotting analyzed the knockdown of LACTB in U87 cells transduced with shNC or shLACTB. (C)Representative images and corresponding quantification of Colony formation assay for U87 cells transduced with shNC or shLACTB. (D)Representative images and growth curve of Incucyte proliferation assay for U87 cells transduced with indicated plasmids. Representative images of cell cycle assays for LN229 (E) and CT-2A (F) cells expressing vector or LACTB/Lactb (relevant to **Fig. 1D**). Representative images of apoptosis assays for LN229 (G) and CT-2A cells (H) expressing vector or LACTB/Lactb (relevant to **Fig. 1E**). (I) Western blotting of LACTB and GAPDH in LN229 cells transduced with teton-LACTB treated with DMSO or DOX for 48 h. LN229*teton-LACTB* cells with indicated treatments were subject to colony formation (J), Incucyte proliferation (K), cell cycle (L), and apoptosis (M) assays. Representative images and corresponding quantification analyses were displayed. (N)Growth curve of subcutaneous tumors established with LN229 cells expressing vector or LACTB (n=5 for each group). (O) Images of xenograft tumors and quantification of tumor weight at the endpoint. (P) Representative Ki67 staining of subcutaneous tumors and Ki67-positive cells were quantified (scale bar: 100 μm). *, *p*<0.05; **, *p*<0.01; ***, *p*<0.001; ****, *p*<0.0001.


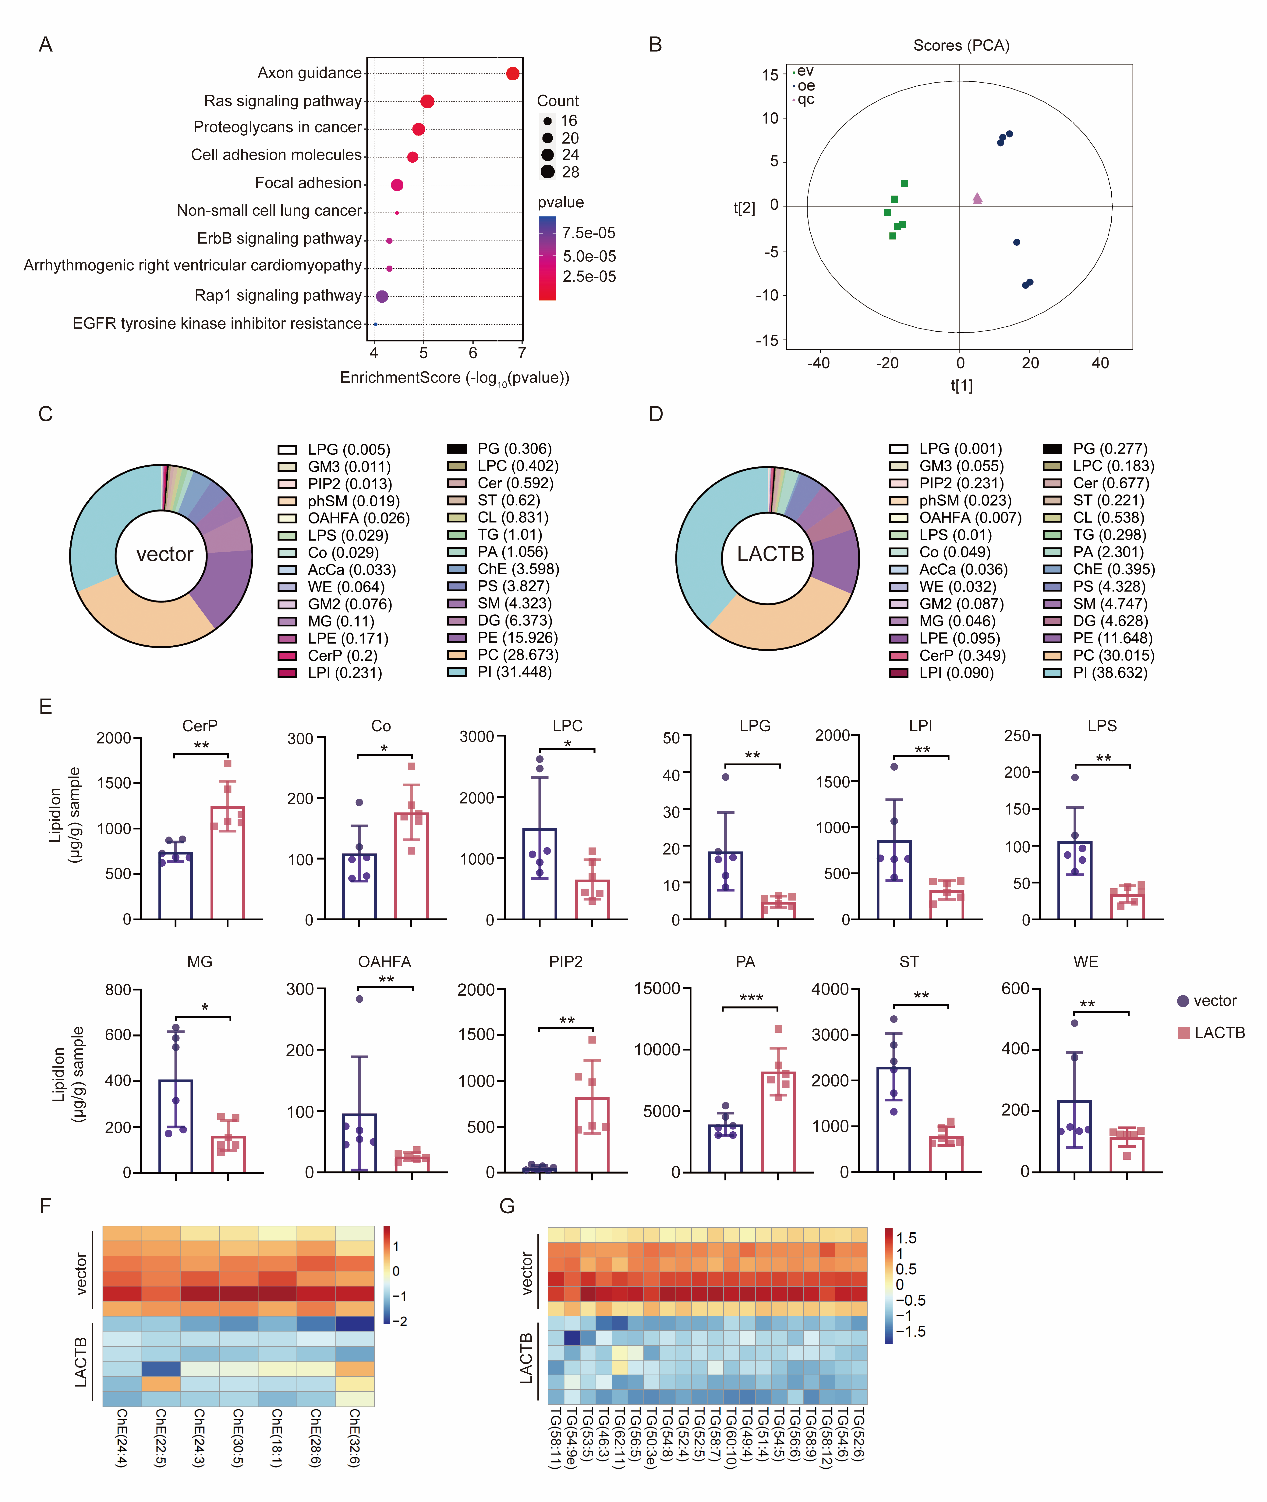


**Supplementary Fig. S2. LACTB rewires lipid metabolism of glioma cells.** (A)KEGG analysis of upregulated DEGs of LN229 cells upon LACTB overexpression (top 10 enriched pathways were displayed). (B) PCA of untargeted lipidomics (n=6 for each group). ev, empty vector; oe, overexpression; qc, quality control. Pie charts of lipid species in LN229 cells expressing vector (C) or LACTB (D). (E) Levels of the indicated lipid in LN229 cells expressing vector or LACTB. Heat maps showing the individual lipids of cholesterol ester (F) and triglyceride (G) detected in LN229 cells expressing vector or LACTB. *, *p*<0.05; **, *p*<0.01; ***, *p*<0.001.


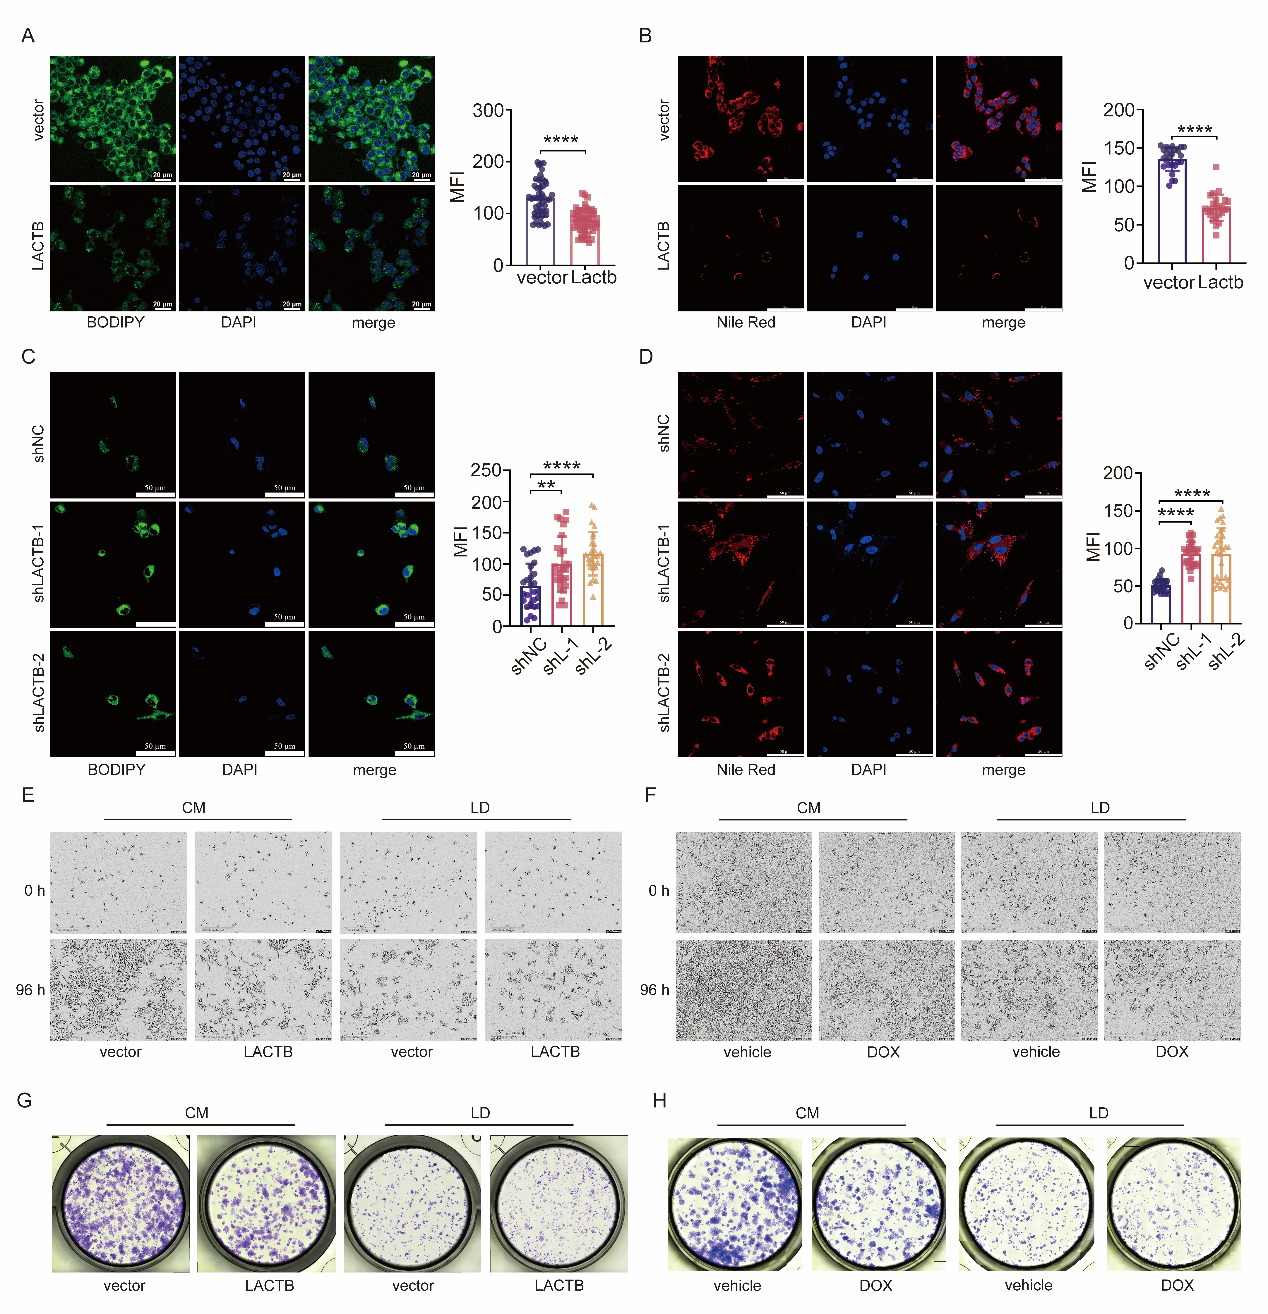


**Supplementary Fig. S3. LACTB suppresses glioma growth through rewiring lipid metabolism.** BODIPY (A) and Nile Red (B) staining of CT-2A cells expressing vector or Lactb. Representative images (left) and quantification (right) were displayed (scale bar: 50 μm). BODIPY (C) and Nile Red (D) staining of U87 cells expressing shNC or shLACTB (scale bar: 50 μm). (E) Representative images of Incucyte proliferation assay for LN229 cells expressing vector or LACTB. Cells were cultured in complete medium (CM) or lipid deprivation (LD) (relevant to **Fig. 2J**). (F)Representative imagens of Incucyte proliferation assay for LN229*teton-LACTB* cells treated with DMSO or DOX (relevant to **Fig. 2K**). (G) Representative images of colony formation for LN229 cells expressing vector or LACTB (relevant to **Fig. 2L**). (H) Representative imagens of colony formation assay for LN229*teton-LACTB* cells treated with DMSO or DOX (relevant to **Fig. 2M**). **, *p*<0.01; ****, *p*<0.0001.


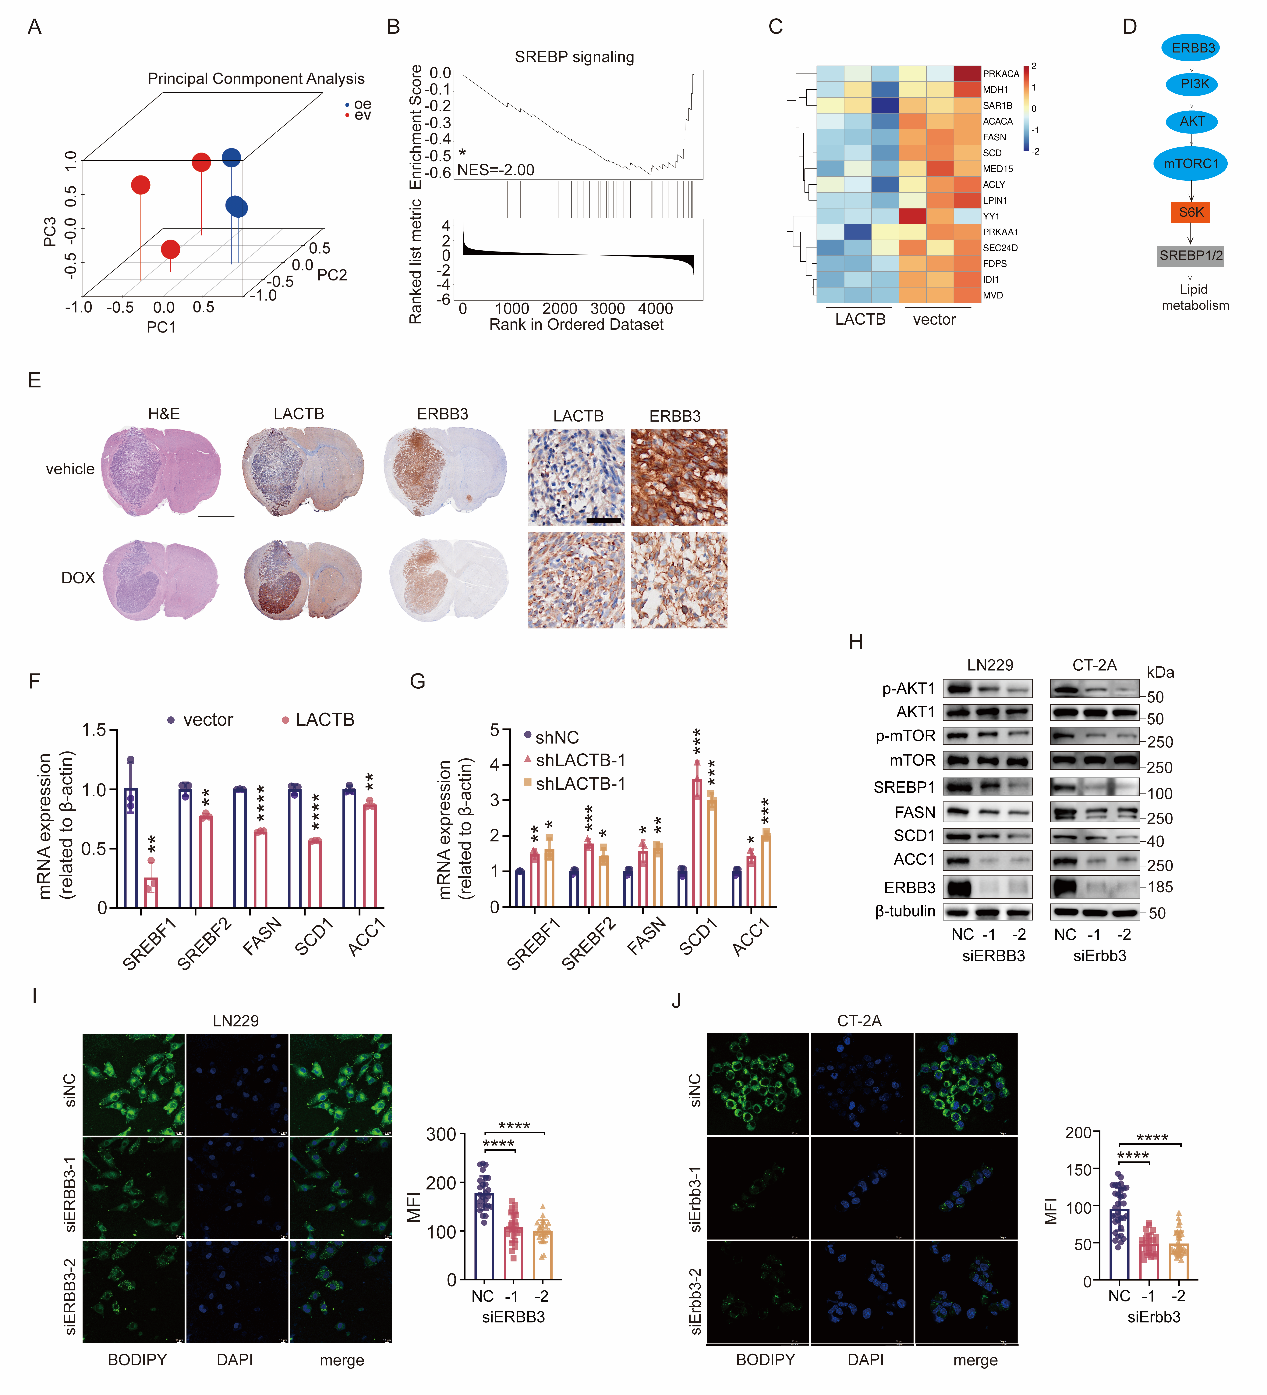


**Supplementary Fig. S4. LACTB downregulates ERBB3 to inhibit lipid synthesis in glioma cells.** (A)PCA of protein mass spectrometry of LN229 cells expressing vector or LACTB (n=3 for each group). (B) GSEA of differentially expressed proteins between LN229 cells expressing LACTB versus control cells. SREBP signaling was significantly downregulated upon LACTB overexpression. (C) Heat map showing the differentially expressed proteins involved in SREBP signaling. (D) Schematic representation of ERBB3/PI3K/AKT/mTOR pathway. (E)Typical images of H&E and IHC staining for brain section from mice transplanted with LN229*teton-LACTB* cells (scale bar: 2 mm and 50 μm). IHC staining of LACTB and ERBB3 was performed. (F) qPCR analysis of typical genes relevant to SREBP signaling in LN229 cells expressing vector or LACTB. (G) qPCR analysis of typical genes relevant to SREBP signaling in U87 cells expressing shNC or shLACTB. (H)LN229 and CT-2A cells transduced with siNC or siERBB3/siErbb3 were subject to western blotting analysis. Signaling and downstream genes mentioned in (D) were detected. Representative images and statistical analyses of BODIPY staining for LN229 (I) and CT-2A (J) cells transduced with siNC or siERBB3/siErbb3. *, *p*<0.05; **, *p*<0.01; ***, *p*<0.001; ****, *p*<0.0001.


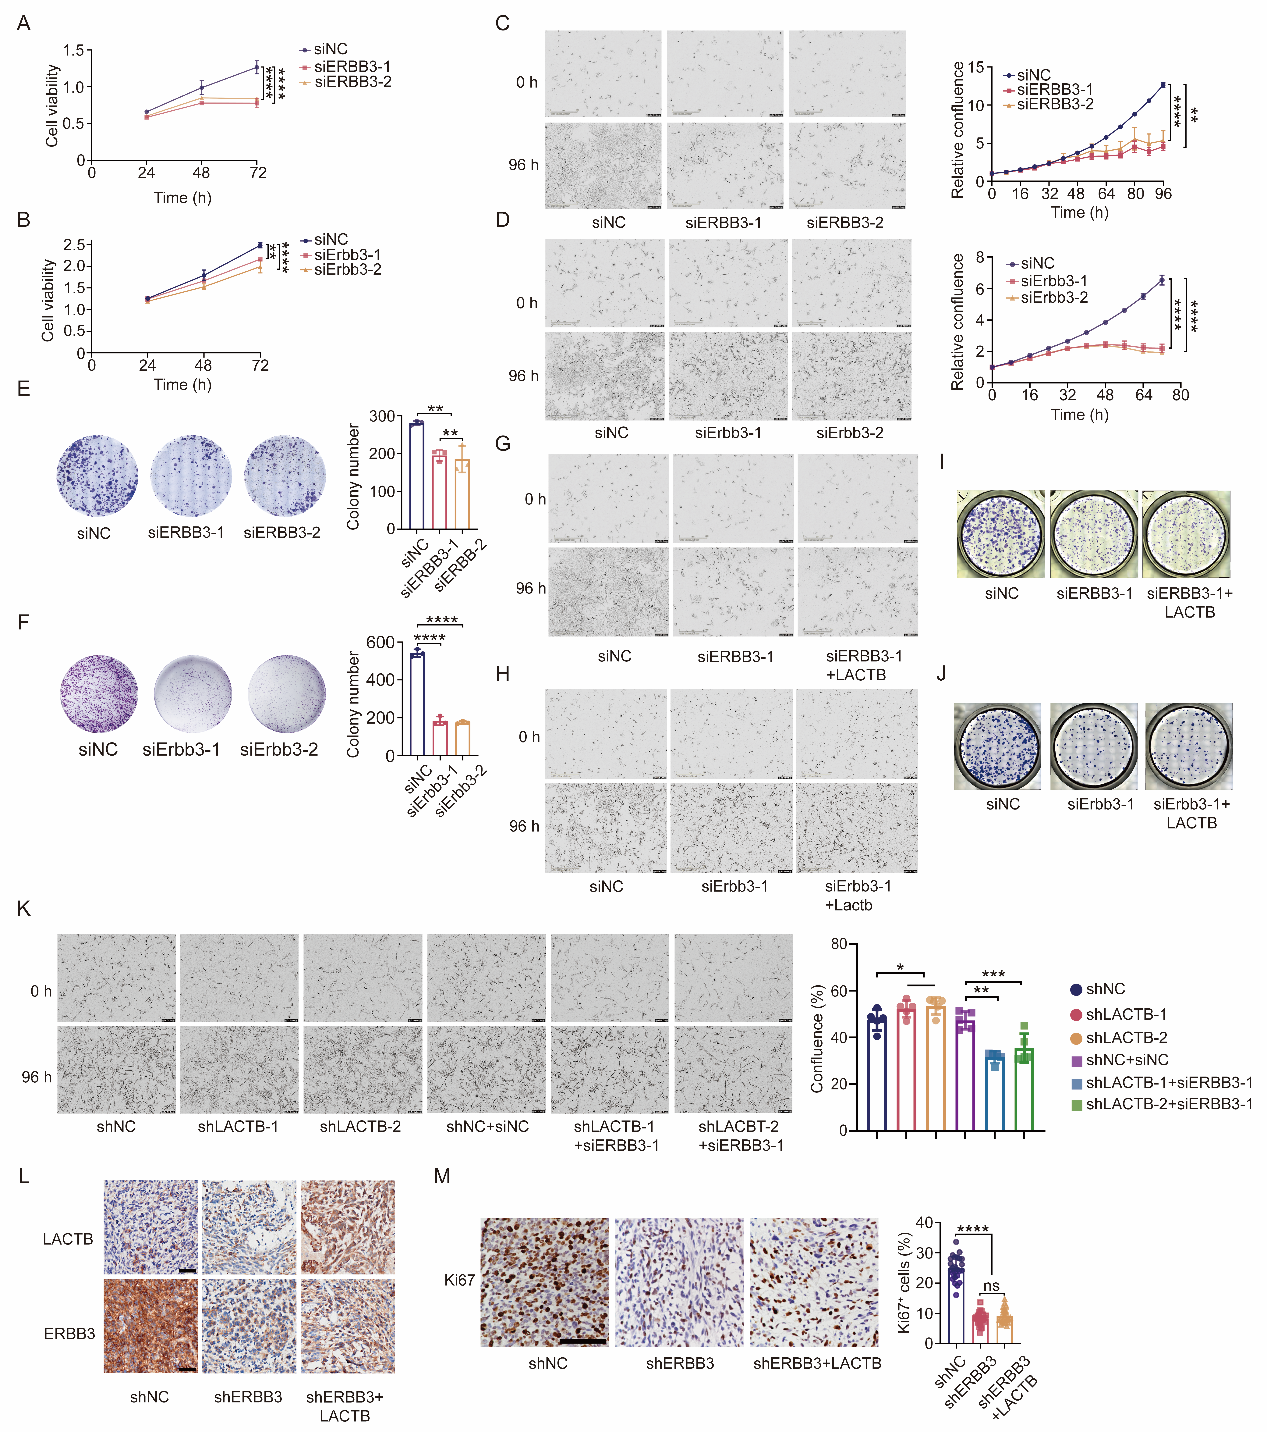


**Supplementary Fig. S5. LACTB downregulates ERBB3 to suppress glioma growth.** CCK-8 assays of LN229 (A) and CT-2A (B) cells transduced with siNC or siERBB3/siErbb3. Representative images and statistical analysis of Incucyte proliferation assays for LN229 (C) and CT-2A (D) cells transduced with siNC or siERBB3/siErbb3. Representative images and quantification of colony formation assays for LN229 (E) and CT-2A (F) cells transduced with siNC or siERBB3/siErbb3. (G) Representative images of Incucyte proliferation assay for LN229 cells transduced with siNC, siERBB3-1, or siERBB3-1 plus LACTB (relevant to **Fig. 3J**). (H) Representative images of Incucyte proliferation assay for CT-2A cells transduced with siNC, siErbb3-1, or siErbb3-1 plus Lactb (relevant to **Fig. 3K**). (I) Representative images of colony formation for LN229 cells with the same treatment as in (G) (relevant to **Fig. 3L**). (J) Representative images of colony formation for CT-2A cells with the same treatment as in (H) (relevant to **Fig. 3M**). (K) Representative images and statistical analysis of Incucyte proliferation assay for U87 cells with indicated transduction. (L) Typical images of IHC staining for LACTB and ERBB3 in brain sections from mice in **Fig.3N** (scale bar: 50 μm). (M) Typical images and quantification of Ki67 IHC staining (scale bar: 50 μm). ns, not significant; *, *p*<0.05; **, *p*<0.01; ***, *p*<0.001; ****, *p*<0.0001.


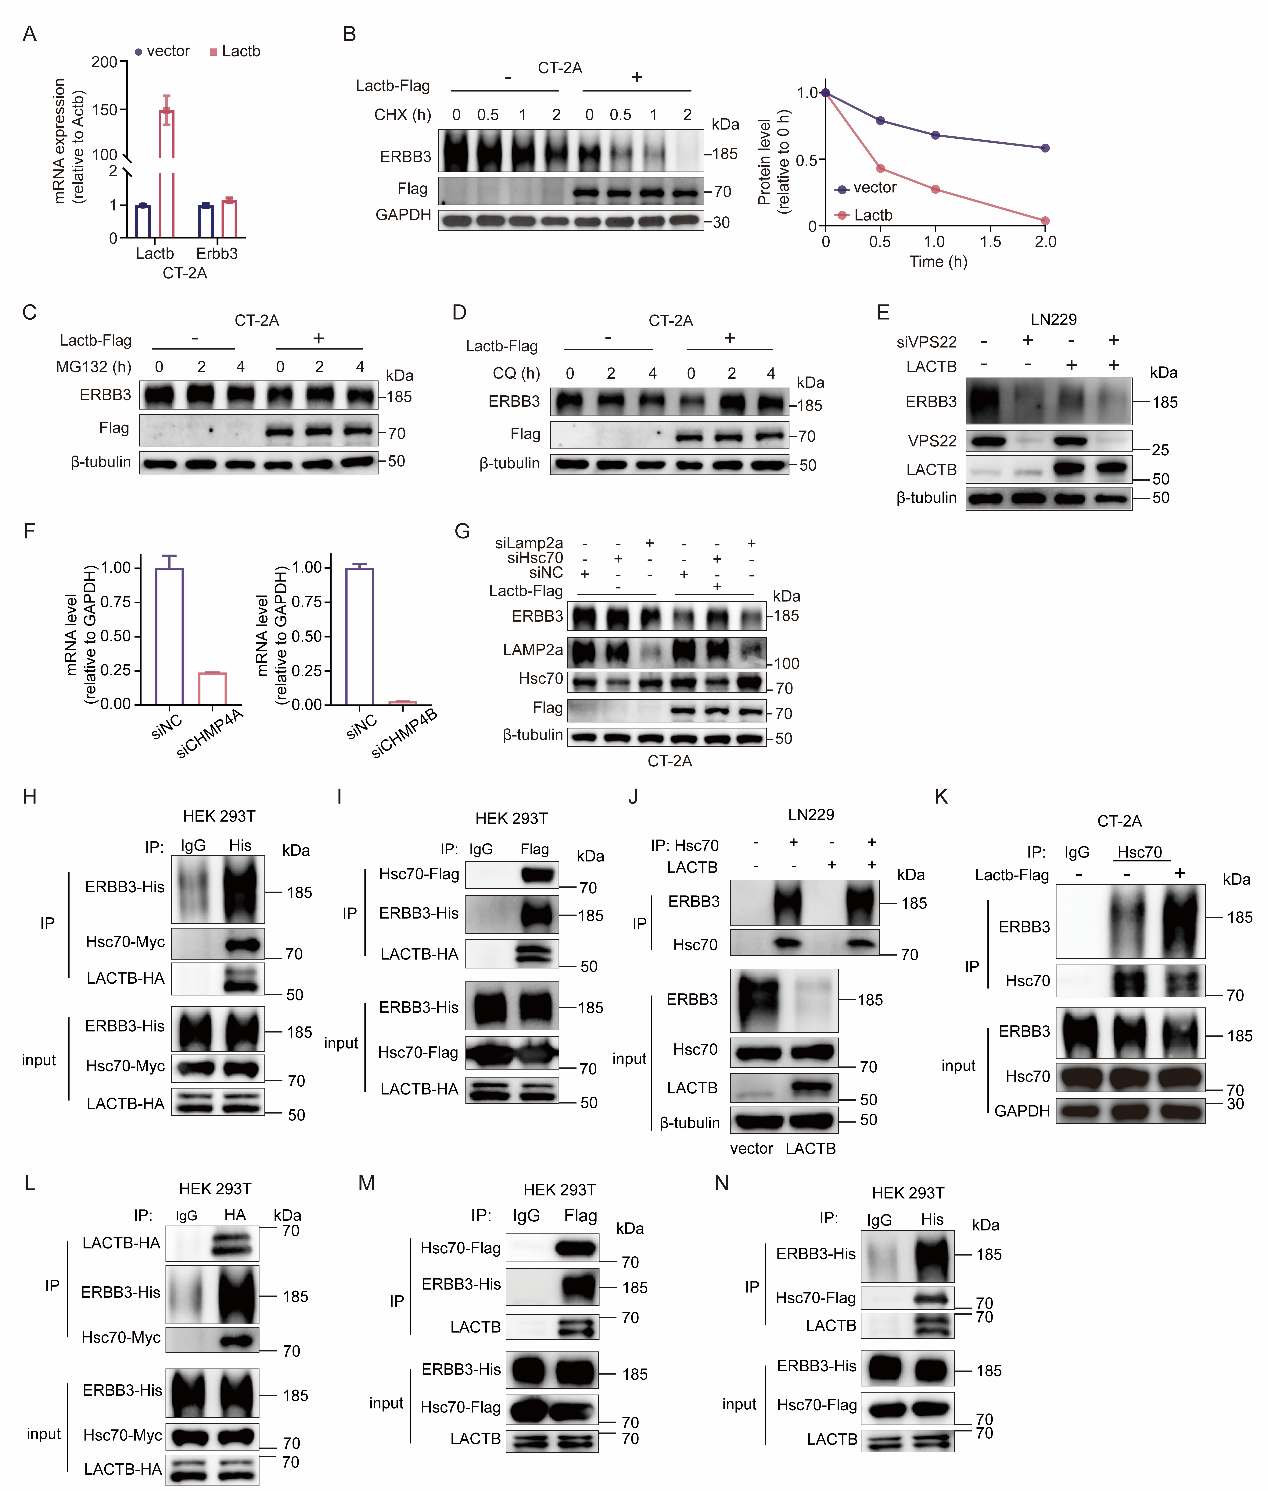


**Supplementary Fig. S6. LACTB promotes the interaction of ERBB3 with Hsc70 to degrade ERBB3.** (A)CT-2A cells transduced with vector or Lactb were lysed for qPCR and mRNA of Lactb and Erbb3 were detected. (B) CT-2A cells expressing vector or Lactb were treated with CHX for the indicated time and were lysed for Western blotting assays. (C) CT-2A cells expressing vector or LACTB were treated with MG132 for 0, 2 or 4 h and were lysed for Western blotting assay. (D) CT-2A cells expressing the indicated plasmids were treated with CQ for 0, 2 or 4 h and Western blotting was performed to detect protein expression. (E) LN229 cells expressing vector or LACTB were treated with siNC or siVPS22 for 48 h and proteins were extracted for Western blotting. (F) qPCR of CHMP4A and CHMP4B in LN229 cells transduced with siCHMP4A and siCHMP4B for 48 h. (G) CT-2A cells expressing vector or Lactb were transduced with siNC, siHsc70 or siLamp2a. Western blotting was performed to detect expression of ERBB3, LAMP2a, Hsc70, LACTB and β-tubulin. HEK 293T cells were co-transduced with Hsc70-Myc, LACTB-HA and ERBB3-His. Whole cell lysates were collected 48 h post transduction and were immunoprecipitated with IgG, His (H) antibody or Flag (I) antibody. Whole cell lysates of LN229 (J) and CT-2A (K) cells expressing vector or LACTB/Lactb were immunoprecipitated with Hsc70 antibody. (L)Hsc70-Myc, LACTB-HA and ERBB3-His were co-transduced into HEK 293T cells. Whole cell lysate was immunoprecipitated with IgG or HA antibody. HEK 293T cells were co-transduced with Hsc70-Flag, S164I and ERBB3-His and cultured for 48 h. Whole cell lysates were collected and immunoprecipitated with IgG, Flag (M) antibody or His (N) antibody.


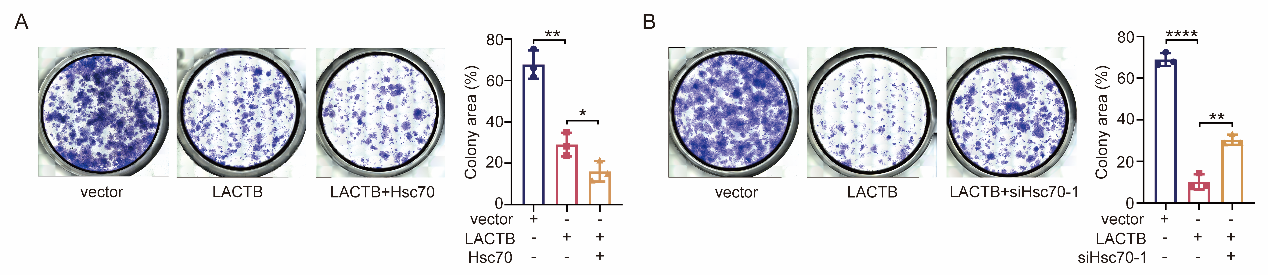


**Supplementary Fig. S7. Hsc70 mediated ERBB3 degradation by LACTB**. (A) Colony formation assay of LN229 cells transduced with vector, LACTB or LACTB plus Hsc70. (B) Colony formation assay of LN229 cells transduced with vector, LACTB or LACTB plus siHsc70. *, p<0.05; **, p<0.01; ****, p<0.0001.

| **Table S1. Sense sequences of the shRNAs and siRNAs used in this study.** | | |
| --- | --- | --- |
| LACTB | sh1 | CCGGATCTTGTTGTGACAGAAACCTTTCAAGAGAAGGTTTCTGTCACAACAAGATTTTTTGGTACC |
| sh2 | CCGGAATCAGTAATCTTGTTGTGACTTCAAGAGAGTCACAACAAGATTACTGATTTTTTGGTACC |
| ERBB3 | sh | CCGGAAGAGCGACTAGACATCAAGCTTCAAGAGAGCTTGATGTCTAGTCGCTCTTTTTTGGTACC |
| VPS22 | si | CUUGCAGAGGCCAAGUAUA |
| LAMP2a | si | GCUCGUUCUGGUCUGCCUAUU |
| Lamp2a | si | GAGAUGAAUUUCACAAUAACA |
| HSPA8 | si | UCAUUCACCACCAUAAAGGGC |
| si | UAAACUCAGCAAUAAAAUGGU |
| Hspa8 | si | CUGUUGUUCAGUCUGAUAUGA |
| ERBB3 | si1 | AAGAGCGACUAGACAUCAAGC |
| si2 | AACCAAUACCAGACACUGUAC |
| Erbb3 | si1 | UCUCAUAGAGUUUGUACAGUG |
| si2 | ACAAAGAUGGCAAACUUCCCA |
| ATG5 | si | AUCUUCUUGUCUCAUAACC |
| TSG101 | si | AUAGAGUAAUAACAUUGACAG |
| HRS | si | CGACAAGAACCCACACGU |
| CHMP4A | si | GGCACAAACUGACGGGACA |
| CHMP4B | si | CGAUAAAGUUGAUGAGUUA |
| VPS4A | si | UCUUUGACUGGCUUCUUGCCG |
| VPS4B | si | AAGUUGAUUCUGUAGUUUCUU |

| Table S2. Primers for qRT-PCR. | |
| --- | --- |
| Genes | Sequences (5’→3’) |
| LACTB | Forward: AGGAGGAAAACGAGCCA |
| Reverse: GACAGAAATCCACCACCAG |
| Lactb | Forward: TCCGGCACTACCGAGTTATC |
| Reverse: CCTTGATCCGGTGTAGCAGAT |
| ERBB3 | Forward: CTTGCCTCGATGTCCTAGCC |
| Reverse: GGTCACACTCAGGCCATTCA |
| Erbb3 | Forward: CCCGCCTCAAAACTCTG |
| Reverse: AAATTCTCTGGGCGTTAGC |
| Reverse: TGTCCCCGTGGTAGGTG |
| GAPDH | Forward: TCCCACCTTTCTCATCCAA |
| Reverse: CCACATCACCCCTCTACCTC |
| Gapdh | Forward: TACCGAAGAACAACGAGGA |
| Reverse: AGAACAGGGGAAATGGAGA |
| SREBF1 | Forward: CAAGTGGTGGGCCTCTCT |
| Reverse: CTGGGCAGGGGTCTCTC |
| SREBF2 | Forward: TCAGGCCAAGAAGAAGGC |
| Reverse: CCCCACAGAGTCCACAAAA |
| FASN | Forward: AAGGACCTGTCTAGGTTTGATGC |
| Reverse: TGGCTTCATAGGTGACTTCCA |
| SCD1 | Forward: TCTAGCTCCTATACCACCACCA |
| Reverse: TCGTCTCCAACTTATCTCCTCC |
| ACC1 | Forward: CTGGGTAGAGCGATTGATG |
| Reverse: ACTGAGCCATTTCCTTCTTG |
| CHMP4A | Forward: GACATCACGGAACAACAGG |
| Reverse: CTCATCCACATCATCTCCAA |
| CHMP4B | Forward: GGAGAAGAGTTTGACGAGGA |
| Reverse: AGAGGGAACATTTGGTAGAGG |
| ACTB | Forward: CATGTACGTTGCTATCCAGGC |
| Reverse: CTCCTTAATGTCACGCACGAT |
| Actb | Forward: CGCGGGCGACGATGC |
| Reverse: GTGGTACGACCAGAGGCATA |
